# Supplementary material for: Cytochrome P450 Enzymes and Drug Metabolism in Humans
Source: MDPI journal article supplement (doi:10.3390/ijms222312808), 2021-11-26
Supplement: s1 [file s1]

**Supplementary Table S1.** Pharmacology of major drug-metabolizing CYPs in humans.

| CYPs                | Tissue sites | Substrates       |                   |                 | Inhibitors       | Inducers                               |
|---------------------|--------------|------------------|-------------------|-----------------|------------------|----------------------------------------|
| CYP1A2<br>[1-3]     | Liver        | amitriptyline    | phenacetin        | caffeine        | amiodarone       | broccoli                               |
|                     |              | propranolol      | clomipramine      | riluzole        | cimetidine       | brussel sprouts                        |
|                     |              | cyclobenzaprine  | ropivacaine       | fluvoxamine     | fluoroquinolones | char-grilled meat                      |
|                     |              | tacrine          | estradiol         | theophylline    | fluvoxamine      | insulin                                |
|                     |              | haloperidol      | verapamil         | imipramine      | furafylline      | methyl cholanthrene                    |
|                     |              | warfarin         | mexiletine        | zileuton        | interferon       | modafinil                              |
|                     |              | naproxen         | zolmitriptan      | ondansetron     | methoxsalen      | $\alpha$ -naphthoflavone               |
|                     |              |                  |                   |                 | mibefradil       | omeprazole                             |
|                     |              |                  |                   |                 | ticlopidine      | tobacco                                |
| CYP2B6<br>[2, 4, 5] | Liver, lung  | bupropion        | cyclophosphamide  | ifosfamide      | thiotepa         | phenobarbital<br>phenytoin<br>rifampin |
| CYP2C19<br>[2, 6]   | Liver        | amitriptyline    | omeprazole        | citalopram      | cimetidine       | carbamazepine                          |
|                     |              | pantoprazole     | clomipramine      | phenytoin       | felbamate        | norethindrone                          |
|                     |              | cyclophosphamide | phenobarbitone    | diazepam        | fluoxetine       | prednisone                             |
|                     |              | E-3810           | progesterone      | hexobarbital    | fluvoxamine      | rifampin                               |
|                     |              | proguanil        | imipramine N-deME | propranolol     | indomethacin     |                                        |
|                     |              | indomethacin     | R-warfarin        | lansoprazole    | ketoconazole     |                                        |
|                     |              | teniposide       | S-mephenytoin     | R-mephobarbital | lansoprazole     |                                        |
|                     |              | moclobemide      | nelfinavir        | nilutamide      | modafinil        |                                        |
|                     |              |                  |                   |                 | omeprazole       |                                        |
|                     |              |                  |                   |                 | paroxetine       |                                        |
|                     |              |                  |                   |                 | probenicid       |                                        |
|                     |              |                  |                   |                 | ticlopidine      |                                        |
|                     |              |                  |                   |                 | topiramate       |                                        |
| CYP2C9<br>[7, 8]    | Liver        | amitriptyline    | phenytoin         | celecoxib       | amiodarone       | rifampin                               |
|                     |              | piroxicam        | diclofenac        | rosiglitazone   | fluconazol       | secobarbital                           |
|                     |              | fluoxetine       | sulfamethoxazole  | fluvastatin     | fluvastatin      |                                        |
|                     |              | suprofen         | glipizide         | tamoxifen       | fluvoxamine      |                                        |

Supplementary Table S1 contd.....

| CYPs             | Tissue sites | Substrates          |                 |               | Inhibitors       | Inducers      |
|------------------|--------------|---------------------|-----------------|---------------|------------------|---------------|
|                  |              | ibuprofen           | torsemide       | irbesartan    | isoniazid        |               |
|                  |              | tolbutamide         | losartan        | S-warfarin    | lovastatin       |               |
|                  |              | naproxen            |                 |               | paroxetine       |               |
|                  |              |                     |                 |               | phenylbutazone   |               |
|                  |              |                     |                 |               | probenicid       |               |
|                  |              |                     |                 |               | sertraline       |               |
|                  |              |                     |                 |               | sulfaphenazole   |               |
|                  |              |                     |                 |               | teniposide       |               |
|                  |              |                     |                 |               | trimethoprim     |               |
|                  |              |                     |                 |               | zafirlukast      |               |
| CYP2D6<br>[2, 9] | Liver        | alprenolol          | S-metoprolol    | amitriptyline | amiodarone       | dexamethasone |
|                  |              | mexiletine          | amphetamine     | minaprine     | celecoxib        | rifampin      |
|                  |              | bufuralol           | nortriptyline   | carvedilol    | chlorpheniramine |               |
|                  |              | ondansetron         | chlorpromazine  | paroxetine    | chlorpromazine   |               |
|                  |              | clomipraminecodeine | perhexiline     | perphenazine  | cimetidine       |               |
|                  |              | debrisoquine        | phenacetin      | desipramine   | clomipramine     |               |
|                  |              | phenformin          | dexfenfluramine | propafenone   | cocaine          |               |
|                  |              | dextromethorphan    | propanolol      | encainide     | doxorubicin      |               |
|                  |              | quanoxan            | flecainide      | risperidone   | fluoxetine       |               |
|                  |              | fluoxetine          | sparteine       | fluvoxamine   | halofantrine     |               |
|                  |              | tamoxifen           | haloperidol     | thioridazine  | levomepromazine  |               |
|                  |              | imipramine          | timolol         | lidocaine     | methadone        |               |
|                  |              | tramadol            | metoclopramide  | venlafaxine   | moclobemide      |               |
|                  |              | methoxyamphetamine  |                 |               | paroxetine       |               |
|                  |              |                     |                 |               | quinidine        |               |
|                  |              |                     |                 |               | ranitidine       |               |
|                  |              |                     |                 |               | haloperidol      |               |
|                  |              |                     |                 |               | ritonavir        |               |
|                  |              |                     |                 |               | sertraline       |               |

Supplementary Table S1 contd.....

| CYPs                                  | Tissue sites | Substrates       |                       |                  | Inhibitors              | Inducers        |
|---------------------------------------|--------------|------------------|-----------------------|------------------|-------------------------|-----------------|
| CYP2E1<br>[10, 11]                    | Liver        | acetaminophen    | halothane             | aniline          | diethyl-dithiocarbamate | ethanol         |
|                                       |              | isoflurane       | benzene               | methoxyflurane   | disulfiram              | isoniazid       |
|                                       |              | chlorzoxazone    | N,N-dimethylformamide | enflurane        |                         |                 |
|                                       |              | sevoflurane      | ethanol               | theophylline     |                         |                 |
| CYP3A4<br>CYP3A5<br>CYP3A7<br>[2, 12] | Liver        | alfentanyl       | lovastatin            | codeine          | amiodarone              | barbiturates    |
|                                       |              | alprazolam       | methadone             | ritonavir        | azithromycin            | carbamazepine   |
|                                       |              | amlodipine       | midazolam             | cyclosporine     | cimetidine              | efavirenz       |
|                                       |              | astemizole       | nelfinavir            | salmeterol       | ciprofloxacin           | glucocorticoids |
|                                       |              | atorvastatin     | nifedipine            | dapsone          | clarithromycin          | modafinil       |
|                                       |              | azithromycin     | nisoldipine           | saquinavir       | delaviridine            | nevirapine      |
|                                       |              | buspirone        | nitrendipine          | dextromethorphan | diethyl-dithiocarbamate | phenobarbital   |
|                                       |              | caffeine         | odanestron            | sildenafil       | diltiazem               | phenytoin       |
|                                       |              | cerivastatin     | pimozide              | diazepam         | erythromycin            | pioglitazone    |
|                                       |              | chlorpheniramine | progesterone          | simvastatin      | fluconazole             | rifampin        |
|                                       | Liver, lung  | cisapride        | propranolol           | diltiazem        | fluvoxamine             | troglitazone    |
|                                       |              | clarithromycin   | quinidine             | tacrolimus       | gestodene               |                 |
|                                       | Fetal liver  | cocaine          | quinine               | erythromycin     | grapefruit juice        |                 |
|                                       |              | tamoxifen        | estradiol             | taxol            | indinavir               |                 |
|                                       |              | felodipine       | terfenadine           | fentanyl         | interleukin-10          |                 |
|                                       |              | testosterone     | finasteride           | trazodone        | itraconazole            |                 |
|                                       |              | haloperidol      | triazolam             | hydrocortisone   | ketoconazole            |                 |
|                                       |              | verapamil        | indinavir             | vincristine      | mibefradil              |                 |
|                                       |              | lercanidipine    | zaleplon              | lidocaine        | mifepristone            |                 |
|                                       |              | zolpidem         |                       |                  | nefazodone              |                 |
|                                       |              |                  |                       |                  | nelfinavir              |                 |
|                                       |              |                  |                       |                  | norfloxacin             |                 |
|                                       |              |                  |                       |                  | ritonavir               |                 |
|                                       |              |                  |                       |                  | norfluoxetine           |                 |

## References

1. Omiecinski, C. J.; Redlich, C. A.; Costa, P., Induction and developmental expression of cytochrome P450IA1 messenger RNA in rat and human tissues: detection by the polymerase chain reaction. *Cancer Res* **1990**, *50* (14), 4315-21.
2. Rendic, S., Summary of information on human CYP enzymes: human P450 metabolism data. *Drug Metab Rev* **2002**, *34* (1-2), 83-448.
3. Racha, J. K.; Rettie, A. E.; Kunze, K. L., Mechanism-based inactivation of human cytochrome P450 1A2 by furafylline: detection of a 1:1 adduct to protein and evidence for the formation of a novel imidazomethide intermediate. *Biochemistry* **1998**, *37* (20), 7407-19.
4. Code, E. L.; Crespi, C. L.; Penman, B. W.; Gonzalez, F. J.; Chang, T. K.; Waxman, D. J., Human cytochrome P4502B6: interindividual hepatic expression, substrate specificity, and role in procarcinogen activation. *Drug Metab Dispos* **1997**, *25* (8), 985-93.
5. Zanger, U. M.; Klein, K.; Saussele, T.; Blievernicht, J.; Hofmann, M. H.; Schwab, M., Polymorphic CYP2B6: molecular mechanisms and emerging clinical significance. *Pharmacogenomics* **2007**, *8* (7), 743-59.
6. Niwa, T.; Yamazaki, H., Comparison of cytochrome P450 2C subfamily members in terms of drug oxidation rates and substrate inhibition. *Curr Drug Metab* **2012**, *13* (8), 1145-59.
7. Miners, J. O.; Birkett, D. J., Cytochrome P4502C9: an enzyme of major importance in human drug metabolism. *Br J Clin Pharmacol* **1998**, *45* (6), 525-38.
8. Mancy, A.; Dijols, S.; Poli, S.; Guengerich, P.; Mansuy, D., Interaction of sulfaphenazole derivatives with human liver cytochromes P450 2C: molecular origin of the specific inhibitory effects of sulfaphenazole on CYP 2C9 and consequences for the substrate binding site topology of CYP 2C9. *Biochemistry* **1996**, *35* (50), 16205-12.
9. Kawata, T.; Tokunaga, S.; Murai, M.; Masuda, N.; Haruyama, W.; Shoukei, Y.; Hisada, Y.; Yanagida, T.; Miyazaki, H.; Wada, M.; Akizawa, T.; Fukagawa, M., A novel calcimimetic agent, evocalcet (MT-4580/KHK7580), suppresses the parathyroid cell function with little effect on the gastrointestinal tract or CYP isozymes in vivo and in vitro. *PLoS One* **2018**, *13* (4), e0195316.
10. Shrivastava, K.; Mindaye, S. T.; Getie-Kehtie, M.; Alterman, M. A., Mass spectrometry-based proteomic analysis of human liver cytochrome(s) P450. *Toxicol Appl Pharmacol* **2013**, *267* (1), 125-36.
11. Yoo, J. S.; Cheung, R. J.; Patten, C. J.; Wade, D.; Yang, C. S., Nature of N-nitrosodimethylamine demethylase and its inhibitors. *Cancer Res* **1987**, *47* (13), 3378-83.
12. Shimada, T.; Yamazaki, H.; Mimura, M.; Inui, Y.; Guengerich, F. P., Interindividual variations in human liver cytochrome P-450 enzymes involved in the oxidation of drugs, carcinogens and toxic chemicals: studies with liver microsomes of 30 Japanese and 30 Caucasians. *J Pharmacol Exp Ther* **1994**, *270* (1), 414-23.
